# Supplementary material for: A novel subclonal rearrangement of the STRN3::PDGFRB genes in de novo acute myeloid leukemia with NPM1 mutation and its leukemogenic effects
Source: Research Square preprint supplement (doi:10.21203/rs.3.rs-2716740/v1), 2023-03-23
Supplement: Supplementary file 1 [file 49174edabc0ab5ed319f7a1a.xlsx]

## Sheet: Sheet1
ABCB1	BRCA1	CIITA	EZH2	IZKF1	MCL1	PIK3CD	SMC1A	U2AF1
ABL1	BRCA2	CREBBP	FAM46C	IKZF2	MEF2B	PIM1	SMC3	VHL
ANKRD26	BRIP1	CRLF2	FAS	IKZF3	MFHAS1	PLCG2	SOCS1	WHSC1
APC	BTG1	CSF1R	FAT1	IL7R	MPL	PPM1D	SRP72	WT1
ARID1A	BTK	CSF3R	FBXO11	IRF4	MTOR	PRDM1	SRSF2	XPO1
ARID1B	CALR	CTCF	FBXW7	IRF8	MYC	PRF1	STAG2	ZAP70
ARID2	CARD11	CUX1	FLT3	ITPKB	MYD88	PRKDC	STAT3	ZRSR2
ASXL1	CBL	CXCR4	FOXO1	JAK1	MYOM2	PRPF8	STAT5B
ATG2B	CBLB	DDX41	GATA1	JAK2	NF1	PTEN	STAT6
ATM	CBLC	DIS3	GATA2	JAK3	NOTCH1	PTPN11	SUZ12
ATRX	CCND1	DKC1	GFI1	KDM6A	NOTCH2	RAD21	SYK
B2M	CCND3	DNM2	GNA13	KIT	NPM1	RELN	TAL1
BCL10	CD28	DNMT3A	GNAI2	KMT2A	NRAS	RHOA	TCF3
BCL2	CD58	EED	GNAS	KMT2B	NT5C2	RUNX1	TERC
BCL6	CD79A	EGFR	GNB1	KMT2C	PALB2	SBDS	TERT
BCOR	CD79B	EGLN1	GSKIP	KMT2D	PAX5	SETBP1	TET2
BCORL1	CDKN1A	ELANE	HAX1	KRAS	PDGFRA	SETD2	TNFAIP3
BIRC3	CDKN2A	EP300	HRAS	KRT20	PDGFRB	SETDB1	TNFRSF14
BLM	CDKN2B	EPHA7	ID3	LMO2	PHF6	SF3B1	TP53
BPGM	CEBPA	EPOR	IDH1	LYN	PIGA	SGK1	TPMT
BRAF	CHD8	ETV6	IDH2	MAP2K1	PIK3CA	SH2B3	TRAF3
