# Supplementary material for: A novel subclonal rearrangement of the STRN3::PDGFRB genes in de novo acute myeloid leukemia with NPM1 mutation and its leukemogenic effects
Source: Research Square preprint supplement (doi:10.21203/rs.3.rs-2716740/v1), 2023-03-23
Supplement: Supplementary file 2 [file a27edacb1aced4a76a0f3142.docx]

Supplementary materials

1. Construction of *ETV6::PDGFRB*, SP-△(77-136), SP-△(71-79) or SP-△(166-183) retroviral expression vectors.

To generate the full-length *ETV6::PDGFRB* expression plasmid, the CDS region of exon 1-4 of *ETV6* cDNA sequences were excised from the pCDH-MCS1-EF1-ETV6::ABL1-flag-copGFP plasmid (provided by Dr.Meizhen Xu, Institute of Hematology, China) and the CDS region of exon 11-23 of *PDGFRB* cDNA sequences from a *STRN3::PDGFRB* retroviral vector in the MSCV retroviral backbone containing both the *STRN3::PDGFRB* and eGFP cDNA with an IRES.

The *ETV6* fragment was amplifed by: EP-F1 (5’-GAATTAGATCTCTCGAGGCCACCATGTCTGAGACTCCTGCTCAGT-3’), EP-R1 (5’- CACCTTAAAGGGCAAGGCTTCTTCATGGTTCTGATGCAG -3’）.

The *PDGFRB* fragment was amplifed by: EP-F2 (5’-TCAGAACCATGAAGAAGCCTTGCCCTTTAAGGTGGTGGT-3’), EP-R2 (5’-AGGGGGGGGGGGCGGAATTCCTACTTGTCATCGTCGTCCTTG-3’)

The amplified fragments were purified using the TaKaRa MiniBEST Agarose Gel DNA Extraction Kit Ver.4.0 (Takara, Dalian, China) and subsequently mixed as the template for PCR using primers EP-F1 and EP-R2 to obtain full-length cDNA. The 2.2-kb *ETV6::PDGFRB* (EP) with a Flag tag was cloned into pMSCV-IRES-eGFP (pMIG, between XholI abd EcoRI) using EasyGeno Assembly Cloning Kit (Tiangen, Beijing, China), to yield pMSCV-EP-IRES-eGFP.

For SP-△(77-136) cloning, SP-CF1 (5’-TAGGCGCCGGAATTAGCCACCATGGACGAGCTTGCCG-3’) and SP-CR1 (5’-GTTCCGTGCCATACCACTCGTGCTGGATGTAGTGC-3’) were used for PCR to produce fragment 1. For fragment 2, SP-CF2 (5’-CGAGTGGTATGGCACGGAACTGAACCAAGG-3’) and SP-CR2 (5’-CGTCCTTGTAATCCAGGAAGC-3’) were used. The pMSCV-IRES-eGFP was digested with EcoR I and Xhol I. The amplified fragments and linearized pMIG were purified, and ligated by using EasyGeno Assembly Cloning Kit (Tiangen, Beijing, China), to yield pMSCV- SP-△(77-136) -IRES-eGFP.

For SP-△(71-79) cloning, pMSCV-SP-IRES-eGFP was linearized by PCR, using SP-CavF1 (5’- GGATACTGCACGAGATGGAGCGGGCGCACTGGGAGGTGGAA-3’) and SP-CavR1 (5’- CCGCTCCATCTCGTGCAGTATCCCCGGGATAGTGTACTGCTG-3’), and then ligated by using EasyGeno Assembly Cloning Kit, to yield pMSCV-SP-△(71-79)-IRES-eGFP.

For SP-△(166-183) cloning, pMSCV-SP-IRES-eGFP was linearized by PCR, using SP-CalF1 (5’- CCACAGCACCTCAGGAAGTAGGTTATACAGATACAATATTAGATGTAC-3’) and SP-CalR1 (5’- CCTACTTCCTGAGGTGCTGTGGGAGCCTCTGTGTCTTTGGTTTCT-3’), and then ligated by using EasyGeno Assembly Cloning Kit, to yield pMSCV-SP-△(166-183)-IRES-eGFP.

**Supplementary Figure 1**


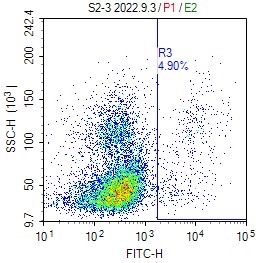

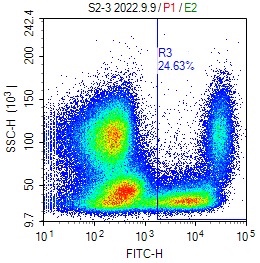

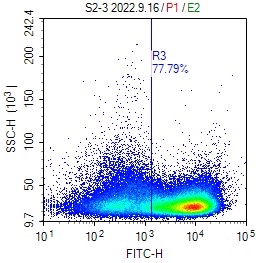


The flow cytometry analysis of peripheral blood from S7-F1 group mice showed that Gr-1/ CD11b positive cells disappeared gradually after transplant, but CD3/CD4/CD8 positive T cells gradually become dominant clone

**Supplementary Figure 2**

Western blot of spleen cells from different mice confirmed the expression of the STRN3::PDGFRB fusion protein.

**Supplementary Figure 3**

B

Cartoon showing disease development in recipients of cells from serial passage. Secondary recipients (A1 through 5) received 5×105 spleen from mouse S7. Spleen cells were transferred to tertiary recipients. All mice receiving bone marrow cells developed T-cell lymphomas with characteristics similar to S7A4.

**Supplementary Figure 4**

B

**
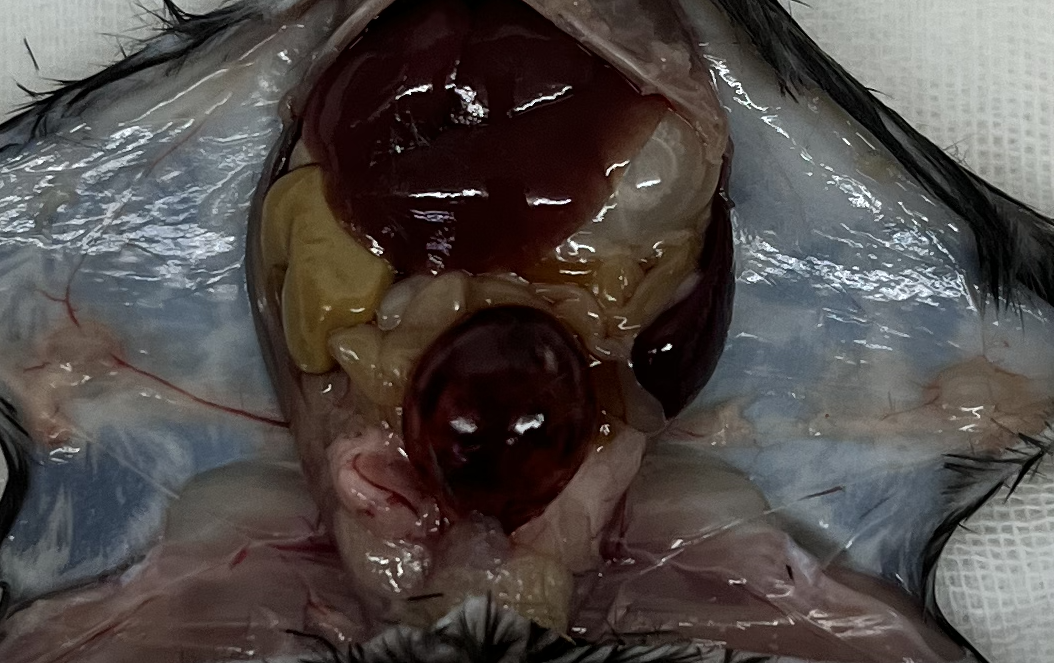
** **
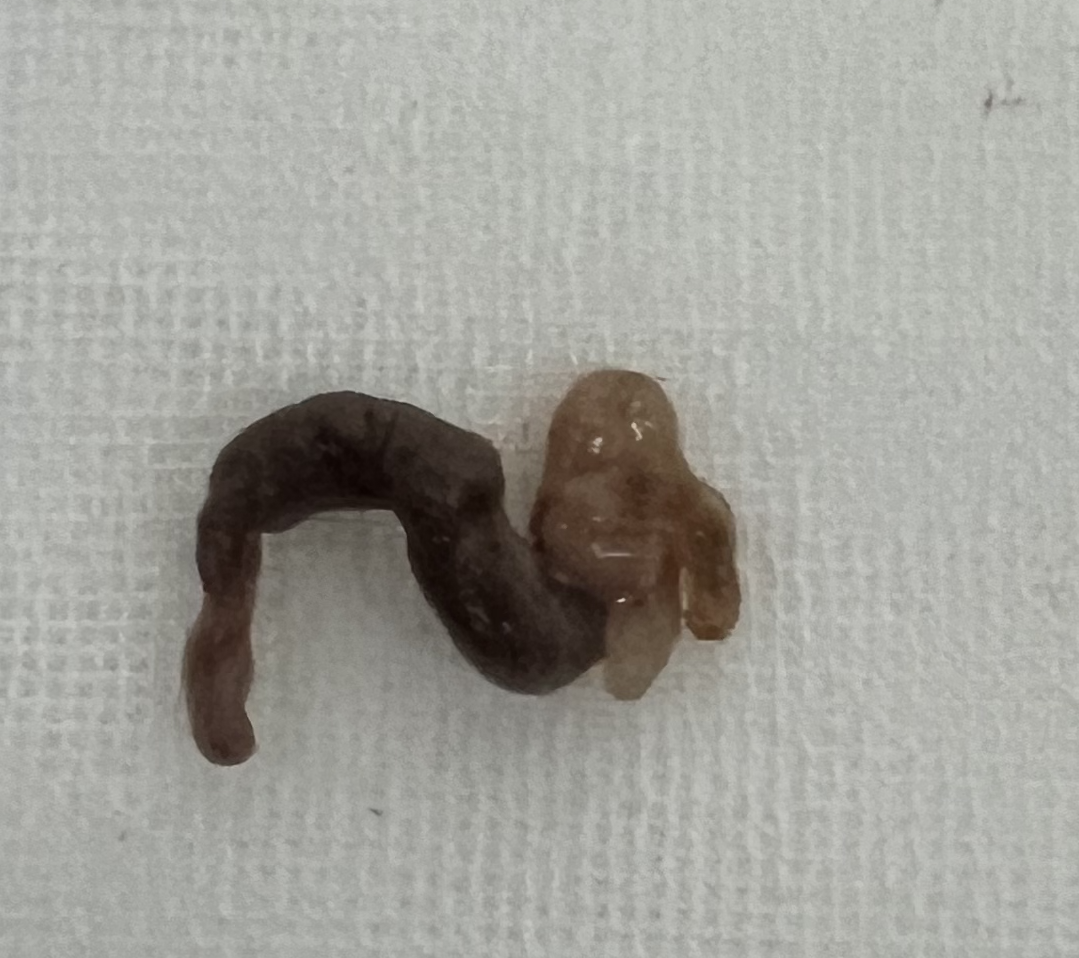
**

A

Gross images of the gastrointestinal (GI) tract in mice that treated selinexor. Images are of mice at 10 days post-treatment. GI tract dissected from mice in A.

**Supplementary Figure 5**


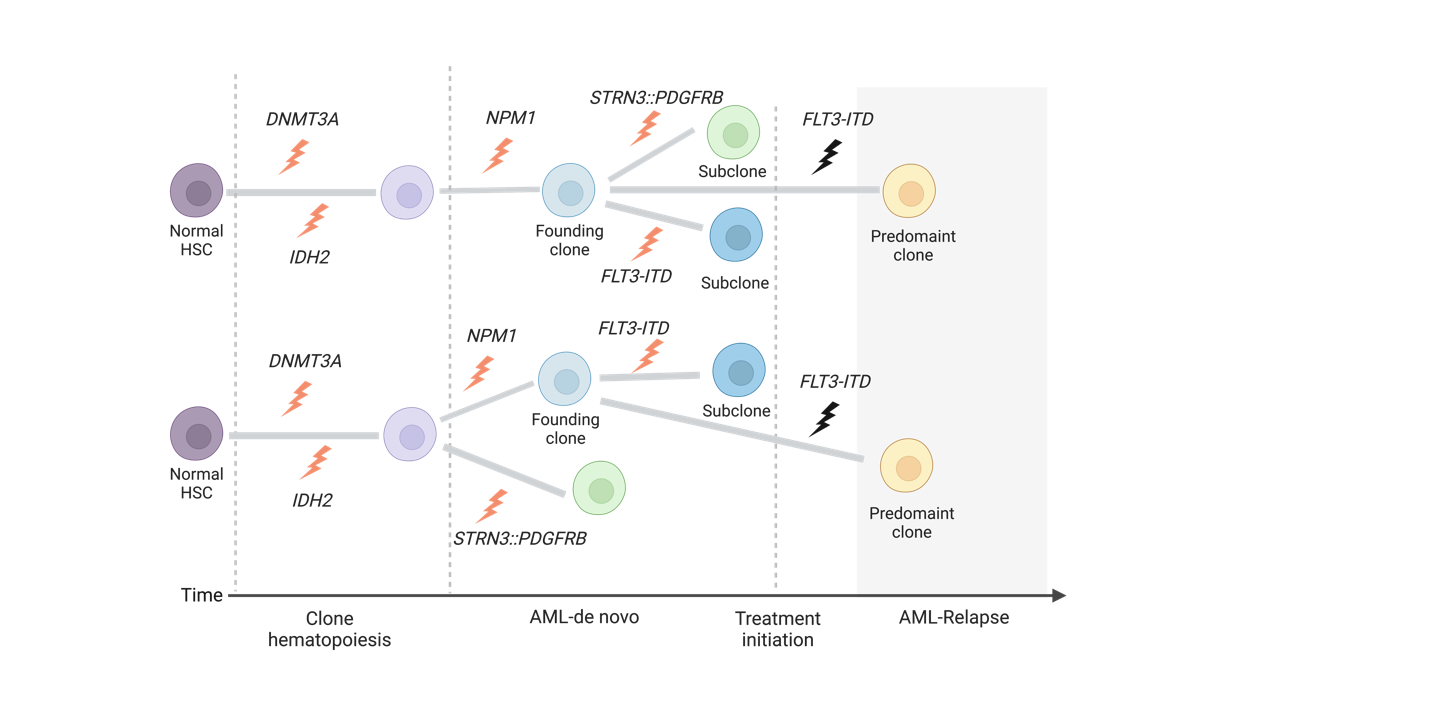


There are two possibilities of the clonal architecture of this patient: 1, *DNMT3A* and *IDH2* mutations are early genetic events that are responsible for the generation of a clonal hematopoiesis. *NPM1* mutations are gatekeepers for AML, whereas *FLT3-ITD* and *STRN3::PDGFRB* mutations are late events; 2, Under earlier mutations (such as *DNMT3A* and *IDH2*), *NPM1* and *STRN3::PDGFRB* subclones appeared simultaneously, in which *NPM1* was the predominant clone and *FLT3-ITD* subclone appeared.
